# Supplementary material
Source: publisher figshare collection journal article supplement (https://sage.figshare.com/ndownloader/files/21904185)
Supplement: Supplementary file 1 [file 21904185]

**Re-enmarcando identidades en el cine documental argentino: la emergencia de personas LGBT como sujetos políticos en *Rosa Patria* (Loza, 2008-2009) y *Putos peronistas* (Cesatti, 2011)**

**Guillermo Olivera**

En este artículo me propongo explorar los cambios de marco generados por el Nuevo Cine Argentino y por las condiciones socio-culturales y políticas de la Argentina post-default, como respuesta a las rearticulaciones de los sujetos ‘minorizados’ (Schaffer, 2008) y oprimidos por su condición sexo-genérica y/o por su sexualidad. Más específicamente, este trabajo analiza, a partir de dos producciones documentales particulares (*Rosa Patria* [Loza, 2008-2009] y *Putos peronistas cumbia del sentimiento* [Cesatti, 2011]), los marcos y re-enmarques cinematográficos de su ‘derecho a la ciudad’ (Lefevre, 1975; Molano Camargo, 2016) y a la ciudadanía en un sentido tanto espacial-urbano como doblemente político. En sentido político, en primer lugar, porque estos procesos se analizan en relación con sus procesos de transformación en sujetos de la esfera pública, relevantes para la política, y en segundo lugar, político porque lo que se analiza son los predicamentos críticos propuestos por estos documentales conducentes a demandas por una ciudadanía plena en un contexto de profunda crisis económica e institucional, demandas que eventualmente resultaron en la reactivación de la ciudadanía sexual a través de la promulgación de la Ley de Matrimonio Igualitario (2010) y la Ley de Identidad de Género (2012).

Tanto el espacio urbano como la problematización de la auto-identidad sexual dentro de las intersecciones identitarias entre clase, género y sexualidad son agentes clave en la mayoría de estos documentales: estos son los aspectos centrales de mi análisis, cuyo argumento principal es que la emergencia de visibilidades LGBT *situadas* –es decir, articuladas a las condiciones locales e históricas específicas– se registra a través de la visibilización cinematográfica de procesos de (auto)-identificación personal y colectiva. En este sentido, este artículo se orienta hacia los debates teórico-políticos contemporáneos en América Latina sobre sexualidad y género no tomados aisladamente, sino en el lugar que ocupan junto con otras condiciones tales como clase social, etnicidad, edad, nación/región y afinidad política, y los roles que ocupan la sexualidad y el género en la construcción discursiva y material no solo de experiencias sino de las propias categorías identitarias, como lo discuten, por ejemplo, French y Bliss (2007). Particularmente, el lugar central que adquieren tanto la categoría de ‘identidad’ como las políticas identitarias en los debates académicos y políticos latinoamericanos sobre sexualidades y géneros de las últimas décadas (French y Bliss, 2007: 22). Partimos así del sentido específico que adquiere lo ‘*queer*’ en tales contextos, en los cuales dicha categoría no señala solo y simplemente ‘rareza’, devenir y fluidez, sino *identidad/es* situadas, ya que las políticas identitarias siempre han sido centrales en cómo se ha construido históricamente lo *queer*, particularmente en el caso argentino.

Ahora bien, dichos procesos de identificación y auto-narración colectiva son políticos no porque sean sociales ni porque refuercen o desestabilicen identidades concretas (identidades ya socialmente sedimentadas), sino porque son constituyentes e instituyentes (Laclau, 1994) –y no meramente constitutivos– de identidades sociales. Estos procesos son analizados, como se ha mencionado antes, en un corpus de documentales LGBT de fuerte impronta política producidos inmediatamente antes de la promulgación de las Leyes de Matrimonio Igualitario (2010) y de Identidad de Género (2012), en un momento histórico de intensos debates sobre reconocimiento social y legal de estos sujetos: *Rosa Patria* (Loza, 2008-2009) y *Putos peronistas, cumbia del sentimiento* (Cesatti, 2011-2012) han articulado efectiva y transformadoramente las diferencias sexo-genéricas de una manera que es radicalmente diferente respecto de las representaciones previas de los sujetos LGBT.[[1]](#endnote-2)

Abrevándome en herramientas metodológicas provenientes de la semiótica del cine, del concepto socio-semiótico de ‘marco’ [*frame*] (Goffman, 1986; Tagg, 2009; Butler, 2010; Zizek, 2014) y del análisis político del discurso propuesto por Laclau, Mouffe y Žižek, este trabajo propone leer las representaciones cinematográficas de las personas LGBT en estos documentales como atravesando un pasaje histórico-discursivo clave de imágenes a ‘identidades’, o de ‘elemento’ a ‘momento’ según la terminología conceptual propuesta por Laclau y Mouffe (1987), y como una simbolización cinematográfico-reflexiva (Metz, 1991) de los procesos específicos de dislocación (Laclau, 1990) de las identidades LGBT. En otras palabras, se analizan representaciones, pero en realidad, a lo que apunta dicho análisis es a aquellos *procesos* de pasaje y dislocación implícitos a través de los cuales las identidades llegan a instituirse (es decir, se apunta en última instancia no a representaciones, sino a *procesos* de institución de identidades [Laclau, 1994; Laclau y Zac, 1994]). Lejos de toda noción metafísica de representación como *Vorstellung* o como *adequaetio* respecto de un contenido que le sería anterior (esencialismo del sujeto y transparencia/distorsión de su representación), tomo aquí ‘representación’ desde el punto de vista específico que se ha desarrollado desde el análisis del discurso político (Laclau y Mouffe, 1987: 132-141; Laclau, 1996: 149-182; 2005: 157-171). Partiendo entonces de ‘marcos’ y marcas textuales identificables en la superficie misma de representaciones cinematográficas concretas, mi trabajo apunta, en realidad, a aquellos procesos de pasaje de ciertos *elementos* *no identificables o visibles como tales* –por el efecto de sedimentación producido por la sutura de un sistema socio-discursivo impermeable a estas diferencias– a *momento* –en los documentales del nuevo milenio. Estas estructuras socio-discursivas suturadas por sedimentación es lo que en este trabajo entiendo como ‘*lo social*’ a partir de Laclau y Mouffe (1987) y Laclau (1994), por oposición a lo político.

Se trata, en definitiva, de estudiar estos pasajes de elemento a momento como ‘cambios de marco’ con sus posibilidades inherentes de des-enmarque, re-enmarque (Butler, 2010, Zizek, 2014)[[2]](#endnote-3), o de ‘anulación retroactiva’ o de ‘deshacer’ (Butler, 2004, 2010) de las concepciones heteronormativas dominantes de sexualidades y géneros. El marco, en última instancia, no señala otra cosa que historicidad, y más precisamente, historicidad en tanto que ruptura, cesura y discontinuidad.

**1. *Rosa Patria* (Loza, 2008-2009)[[3]](#endnote-4)**

*Rosa Patria* es un documental biográfico que, a través de la figura de Néstor Perlongher como persona, poeta, antropólogo y activista político de la luchas sexuales, representa la emergencia de los homosexuales, en estrecha alianza con las feministas, en el espacio público argentino en tanto que sujetos identificados tanto como personas sexuales como sujetos políticos articulados a las luchas de la izquierda de los años sesenta y setenta. Tal proceso histórico, que incluye la formación del FLH (Frente de Liberación Homosexual) en 1971, fue un verdadero acontecimiento histórico en la medida en que contribuyó a inaugurar un largo proceso de cambio de marco para la política: proceso de re-enmarcado que Palmeiro (2016: 109) ha designado de ‘erotización de la política’ y ‘politización del cuerpo’. Sin embargo, en el campo de la representación cinematográfica, semejante cambio de marco tuvo que esperar hasta el nuevo milenio para poder registrarse documentalmente como tal.[[4]](#endnote-5)

El reconocimiento de los homosexuales como sujetos de la polis –entre inclusión, discriminación y exclusión– es un acontecimiento no simplemente porque haya comenzado a suceder, sino porque implica un cambio de marco interpretativo de inteligibilidad (Žižek, 2014) señalando así una cesura histórica en el orden de la temporalidad. La hipótesis de trabajo es que este re-enmarcado o acontecimiento dislocador se textualiza en el documental de Loza como puesta en abismo de la representación. En términos de Žižek (2014), este proceso puede leerse como una ‘estructura de ficción’ que, abierta en el interior mismo del documental, re-enmarca las diversidades sexuales. ¿Pero cómo las re-enmarca? Creando un nuevo espacio textual –la ficcionalidad misma de todo texto documental– capaz de poner en discurso el acontecimiento traumático de su dislocación, logrando simbolizar así el antagonismo que lo constituye (Žižek, 1990).

**1.1. Marco visual**

*Rosa Patria* tematiza y problematiza el estatuto de la puesta en escena –esto es, el estatuto mismo de la enunciación, y por lo tanto del lenguaje y de la constitución de colectivos (Verón, 2001: 67-86)– y lo hace a través de procedimientos tanto teatrales como cinematográficos. Resulta entonces pertinente explorar esta dimensión enunciativa, y distinguir en este filme, a partir de Metz (1991), dos tipos de procedimientos (meta)enunciativos. Por un lado, (a) las diversas técnicas de *mise en avant* o *foregrounding* [puesta en primer plano, mostración] del artificio técnico de la puesta en escena, tanto en términos teatrales como cinematográficos. Por otro lado, (b) la *mise en abyme* [puesta en abismo] de la enunciación fílmica a través de un procedimiento pivotal y recurrente en este documental: ‘el cuadro dentro del cuadro’ o ‘marco dentro del marco’ (Metz, 1991: 71).

Respecto de la primera operación, ciertamente más general, de ‘mostrar el dispositivo’ de la puesta en escena, recurren en la película instancias de exhibición del proceso de filmación como la introducción de cada entrevistado en el estudio de grabación a través de los carteles indicadores del número de toma, los equipos de iluminación, el personal técnico y demás rituales cinematográficos de la producción de tomas. Estos elementos del *backstage* que se muestran no reduplican el hecho enunciativo, sino que simplemente representanmiméticamente el proceso empírico de producción cinematográfica en el interior del enunciado fílmico. En este primer nivel de análisis, el texto documental representa, en gran parte, los procesos de producción y puesta en escena como parte importante de su contenido, y es esta *representación* mimética de la puesta en escena la que otorga el contexto general para la operación metaenunciativa fundamental del filme, que es otra: la *operación* del marco.

Respecto de esta segunda operación –el marco– este documental está estructurado alrededor de los diferentes modos que asume aquello que Metz (1991) designa ‘redoblamiento de la mediación escópica’, en dos sentidos. En primer lugar, se destacan la constante presencia de la pantalla en la pantalla, así como también los sonidos del proceso de proyección de los diferentes segmentos de película, filmados en super 8, que dramatizan la vida de Néstor Perlongher a la manera de ‘film dentro del film’. Estas ‘pantallas interiores’ o ‘segundas’ son, según Metz (1991: 71-78), procedimientos de literalización de un principio (meta)enunciativo más general: la reduplicación enunciativa del ‘marco dentro del marco’. En segundo lugar, también hay instancias en las cuales otros marcos metaenunciativos no fílmicamente literalizados, tales como las fotografías enmarcadas en borde negro o vistas a través de visores; las ventanas; la proyección de diapositivas y fotos sobre la pared de la activista feminista Sara Torres; o los telones y reflectores teatrales que al abrirse, cerrarse o enfocarse dejan ver –enmarcándolas en el interior de la pantalla englobante– diversas performances de la producción literaria de Perlongher.

Es en este sentido que propongo leer *Rosa Patria* no simplemente como una representación mimética del marco, sino como una puesta en acto, esencialmente performativa, de la *operación* misma del marco (Tagg, 2009; Derrida, 1987) respecto de las identidades sexuales: no tanto aquello que se incluye y se excluye –lo visible y lo invisible– sino la puesta en acto de los procesos mismos a través de los cuales dichas exclusiones/inclusiones emergen, y sus condiciones. Así, por ejemplo, es significativo que la secuencia inicial de la película de Loza se abra con imágenes enmarcadas o ‘proyectadas’ de la infancia de Néstor Perlongher –y con los sonidos igualmente enmarcantes de un proyector Super 8– y culmine en la toma de una ‘pantalla en la pantalla’ que sucede a la mirada de Néstor niño, precisamente allí donde éste debería encontrar la mirada de sus padres. Las primeras tomas de Perlongher lo muestran en una escena de juego en su hogar familiar en las que el niño homosexual aparece detrás de las enormes piernas de sus padres –el ángulo de la toma en picada sugiere un punto de vista superior, adulto, quizás el de sus padres. Desde el principio, el niño homosexual aparece así como *ya* (fílmicamente) ‘enmarcado’, pero la escena culmina en una secuencia interrumpida de planos que funciona como ‘punto de fuga’ hacia otro marco. En efecto, la toma en picada del niño mirando hacia arriba, no tendrá el contraplano esperado de la imagen de sus padres, sino que la sutura será interrumpida y la ausencia del contracampo suturante será reemplazada, por corte directo, por la toma metaenunciativa de una pantalla interior aun vacía, pero extremadamente luminosa y fuente de luz, seguida, a su vez, por la primera entrevista en el estudio de filmación, esta vez ‘en grado cero de pantalla’, es decir sin pantalla segunda, como ocurrirá con todas las demás entrevistas y escenas filmadas en estudio. La pantalla luminosa efectúa, así, el primer tránsito del relato metadiegético al diegético, un tránsito entre niveles narrativos que recurrirá con frecuencia en el filme, precisamente a través del pivote de la ‘pantalla en la pantalla’. Su figuración como apertura y luz recurrirá también a lo largo del documental con una función, como veremos, clave: la transición entre mundos (o entre espacios diegéticos y metadiegéticos).[[5]](#endnote-6)

Si para Metz (1991: 75) la pantalla es ‘el lugar del filme, su emplazamiento, el sitio donde éste adviene’, entonces, su materialización literal, espacial, en una pantalla segunda –el cine, la foto-diapositiva y el video en tanto que ‘Pantalla’ o ‘campo de visibilidad’ (Schaffer, 2008: 113)– funciona textual y visualmente en *Rosa Patria* de manera análoga a los significantes vacíos en el discurso político (Laclau, 1996: 69-86): abren el umbral de lo nuevo, un umbral de transformación, de proyección fictivo-creativa y politización identitaria que se materializa en el espacio de la ‘pantalla interior’ como la visibilización de una ‘brecha’ (Laclau, 1994; Laclau y Zac, 1994) o ‘hiato’ (Laclau, 1996: 86), antes invisible, que reenvía a nuevas identificaciones y procesos de subjetivación política entonces solo incipientes, pero emergentes. Es así que la fuerza performativa del marco representado –Metz (1991: 73) lo describe como una reduplicación ‘en acto’– va más allá de la mostración mimética del dispositivo cinematográfico –pegada aun al orden (metafísico) de la representación o *Vorstellung*, de lo dicho (Angus, 2000) o visualmente ‘contenido’ en la imagen– y deja leerse, desde el punto de vista de la Retórica, como procedimiento ‘poético’, en el sentido de que no es una mera mímesis de la enunciación cinematográfica (como en el primer caso explicado más arriba de la mostración del dispositivo o *foregrounding* de la puesta en escena), sino que inaugura un nuevo ‘lugar del decir’ (Angus, 2000: 92-128). Entiendo procedimiento ‘poético’ en el sentido que ha sido otorgado a este término por Ian Angus (2001: 23) en su conceptualización de la comunicación desde el punto de vista retórico: lo poético designa, desde la Retórica, la ‘*institución* de una sociedad’ (o de un colectivo) o de una época histórica mediante la ‘construcción de un *lugar* de discurso’, lugar que Angus identifica con ‘la escena primaria de la comunicación’ y que desde el punto de vista socio-semiótico podría entenderse como la emergencia de una nueva posición (colectiva) de enunciación (Verón, 2013: 421-432), de un nuevo sujeto político (Laclau, 1994; Laclau y Zac, 1994).

Como procedimiento retórico-performativo entonces, la ‘acción poético-visiva’ de la reduplicación de la pantalla realiza a la vez que metaforiza el pasaje de elemento a momento. Este pasaje sólo es posible a partir del elemento ‘fictivo’ (Foucault, 1995), de *fictio iuris* (Laclau & Mouffe 1987: 140) o metadiegético (Genette, 1972) puesto en acto por esa pantalla interior que abre el espacio de la vida de Perlongher como ficción biográfica. Esa ficción creadora o transformadora que define a lo político –lo político no es sino una *fictio iuris* o ‘transposición metafórica’ (Laclau & Mouffe 1987: 140)– metaforiza, en fin, la dislocación como temporalidad irreductible de las identidades en su momento imaginario e instituyente de lo social –esto es, lo poético en y de lo político (Laclau, 1994, Laclau y Mouffe, 1987: 105-166). Esto es así si acordamos con Laclau (1990) que la dislocación es la forma misma de la temporalidad, reenviando a esas cesuras o discontinuidades discursivas (Foucault, 1980: 43-48) que están en la base de toda transformación histórica.

**1.2. Marco narrativo**

La lectura en clave ficcional de lo político me conduce al análisis narratológico. Las pantallas interiores –generalmente iluminadas y fuentes de luz– actúan, desde el punto de vista narrativo, como operadores de transición (meta)diegética: marcando el pasaje entre los dos niveles narrativos –el diegético y el metadiegético– del relato documental. Estas pantallas interiores operan, a su vez, como catalizadores de transgresiones metalépticas (Genette, 1972), en la medida en que introducen ‘fronteras móviles’ y pasajes entre ambos niveles del relato, a través de sus intervenciones a nivel discursivo y de las interacciones entre distintos niveles narrativos que estas pantallas hacen posibles.

La técnica más recurrente es el uso de pantallas iluminadas y sonidos de proyectores cinematográficos que, vacíos de todo contenido particular, no reenvían a nada más que a la propia proyección cinematográfica y al propio acto de enunciación sonora y ‘lectura acústica’ del texto: estos son los operadores metaenunciativos fundamentales que efectúan los pasajes entre estos dos espacios o niveles narrativos (el diegético y el metadiegético). Los ejemplos más ilustrativos de pantallas luminosas tomados de mi análisis son aquellas que introducen dos secuencias metadiegéticas fundamentales, ambas enmarcadas dentro de una pantalla interior: el relato de la historia política de Perlongher (1968-1971) incluyendo su militancia en el FLH, y aquella que narra su vida laboral y erótico-sexual (1972). Introducidas cada una de ellas por sendos compañeros de militancia entrevistados en estudio, el valor transicional de la pantalla luminosa es el pasaje a otros espacios y mundos narrativos: del espacio cerrado, personal y casi familiar del estudio de filmación al espacio público de la ciudad; del mundo narrativo del presente diegético (2008-2009) al mundo narrativo del pasado metadiegético (años setenta).

Esta función de pasajes y ‘fronteras móviles’ entre niveles narrativos (Genette, 1972: 245) es también efectuada por otros marcos que, como indicamos antes, reduplican también, al igual que las pantallas, la mediación escópica. Los telones y los escenarios teatrales, por ejemplo, se (re)introducen recurrentemente como enmarcando promesas de pasaje a otros mundos (públicos, artísticos, políticos). Por ejemplo, resulta significativo que en la secuencia en la cual la voz *off* de Alejandro Ricagno recita su conocido poema *Herida pierna* (Perlongher, 2003: 47-48) introducido con la frase-epígrafe de Lezama Lima ‘deseoso es aquel que huye de su madre’, el recitado esté editado con tomas de un muchacho de torso musculoso realizando una performance corporal fuertemente homoerótica, imágenes que, enmarcadas por las cortinas y el escenario teatral, son sucedidas por la puesta en escena vacía, pero dentro del cuadro de la pantalla segunda, del dispositivo cinematográfico de filmación y el sonido del proyector: la mostración del dispositivo y la pantallizacion en abismo son aquí simultáneas. Estas culminan en la entrevista filmada con Rodolfo Fogwill, cuya profesión creativa y pública de escritor resulta objeto de discusión como parte del *backstage* mostrado y dentro del marco interior de la pantalla segunda, ‘metadiegetica’. En la entrevista, Fogwill es presentado por el cartel de la toma y luego de una negociación con el técnico de producción, como ‘escritor’, en claro paralelo con Perlongher, y luego la entrevista se desarrolla en ‘pantalla grado cero’. En un contexto histórico-cultural que el psicoanalista Germán García había definido como de ‘terrorismo político’ y ‘perversión sexual’ –calificaciones que el propio Perlongher (1997: 132) hace suyas– la cita de Lezama Lima introduce elocuentemente el deseo como momento fuertemente político capaz de generar estos pasajes metalépticos, ligado a un cuerpo enmarcado por el escenario teatral y a la voz de un escritor introducido por el marco de la ‘pantalla en la pantalla’ y dentro de una escena que muestra su propio dispositivo de filmación e iluminación como ya enmarcados por una pantalla.

**2. *Putos Peronistas***

Cabe recordar que el foco principal de las luchas del FLH, tal como lo registra *Rosa Patria*, eran las luchas contra el patriarcado en el capitalismo, en cuyo centro estaban las críticas a los roles dominantes asignados a los géneros y a la función acordada a la sexualidad en la institución familiar dentro del capitalismo en tanto que *modo de producción* (y no en tanto que ideología, o modo de distribución, por tomar dos ejemplos diferentes del uso común o popular de dicho término). Sin embargo, en *Putos Peronistas* el acontecimiento dislocador se desplazará de las sexualidades y de las intersecciones sexualidad-género (*Rosa Patria*), hacia las intersecciones concretas entre estas dos últimas categorías con aquellas otras tan centrales como la clase, la región/nación, o la afinidad política. El re-enmarcado efectuado por este documental opera, entonces, precisamente sobre esta interpelación sobredeterminada desde el principio por la adscripción socio-cultural de clase. El rechazo de la identidad gay como imposición extranjerizante de clase –mero producto importado por una mentalidad colonizada– los conduce a realizar un verdadero trabajo y problematización de su identidad propia, personal y colectiva. Así, antes de ser homosexual, la condición e identidad del ‘trolo’ pobre es la de ‘puto’; del mismo modo, antes de ser lesbiana, la ‘torta’ pobre es ‘puto’; antes de ser travesti, la ‘trava’ es ‘puto’; antes de ser mujer o varón trans, se es ‘puto’: ‘puto’ (peronista) designa una condición interseccional identitaria –y en este sentido, esta identidad es una condición política antes que un atributo psicológico o una realidad social normativa o subversiva. Por lo tanto, precede ontológicamente a la experiencia (fenomenología) en la medida en que constituye esa experiencia (dándole sentido), e instituye las identidades concretas (precediendo su ‘ser’ tanto psicológico como social, incluyendo su carácter normativo o anti-normativo).

Cabe aclarar aquí que ‘puto’ es, gramatical y morfológicamente, la versión masculina de ‘puta’, aunque semántica e interaccionalmente, denote simplemente ‘varón homosexual’ (pasivo y/o activo); significativamente, el significante ‘puta’/‘puto’ nunca nombra, en el habla popular, a la homosexualidad femenina, el lesbianismo nunca está incluido en dicha interpelación injuriante. Sin embargo, su significación connotativa, social, es derogatoria, y su uso pragmático es injuriante (se trata de un insulto), obviamente por la ‘contaminación’ material del significante que se encuentra en el origen mismo del insulto, en su historia lingüística: puto/puta es quien desea a varones, o más precisamente quien goza sexualmente con personas con pene, aun si esas personas no son varones como las travestis, porque ‘puto’ denota, antes que todo, sodomía (diccionario RAE, 2018; Corominas, 2011) o ‘inversión sexual’ masculina (‘hombre invertido’; Moliner, 2006). Si ambos insultos comparten la violencia machista que los genera, ‘puto’, a diferencia de ‘puta’, es además, no solo homofóbico, sino que marca, desde el principio heterosexismo y heteronormatividad en quien lo enuncia (transfobia incluida en tal heteronormatividad). Sin embargo, a pesar de tales diferencias, estos dos términos injuriantes no significan exactamente lo mismo que ‘prostituta/o’. En efecto, si bien hay un uso vulgar o popular que hace equivaler puto/puta a prostituto/prostituta en una de sus acepciones de diccionario (Moliner, 2006; RAE, 2018), es pertinente distinguir, particularmente en el contexto de este artículo, entre los términos puta/o y prostituta/o, en la medida en que tanto ‘puto’ como ‘puta’ comparten algo que los acerca en su significación, y es precisamente eso que comparten, aquello que distingue *a ambos* de la prostitución. Es decir, si la prostitución es la mercantilización del cuerpo/sexo (su venta o intercambio por dinero), igualmente aplicable a mujeres y a hombres (de cualquier sexualidad), la ‘putez’ no: esta última *solo se aplica,* en lengua castellana, *a mujeres heterosexuales y a hombres homosexuales,* es decir aquellos que desean el falo. Es significativo que tanto los varones heterosexuales como las lesbianas sean las dos únicas sexualidades exentas de tal insulto: por ejemplo, un hombre heterosexual ‘fácil’, ‘sexualmente público’ o promiscuo, que tiene relaciones sexuales con muchas mujeres, nunca es considerado como ‘puto’, y solo es ‘prostituto’ si vende su cuerpo/sexo. ‘Putez’ y ‘prostitución’ tienen diferentes vínculos con el orden dominante, y diferentes historicidades: si la primera es producto del patriarcado (y por lo tanto, puede no haber intercambio de dinero en la objetivación del otro/a, sino simplemente *uso o abuso*, sin necesariamente intercambio o forma alguna de mediación mercantil de dicho uso sexual), la segunda tiene que ver con la mercantilización del sexo, con el *mercado*, porque siempre implica una economía basada en el *intercambio*, en el valor de cambio; de allí la noción de ‘trabajador sexual’ que ofrece su cuerpo como fuerza de trabajo en un mercado, el de la prostitución, y no dentro del matrimonio o la institución familiar. Estas diferencias tanto semánticas (lo que denota y connota cada vocablo) como pragmático-interaccionales (a *quiénes* se dirige, a *quiénes* interpela, a *quiénes* hiere) explican que el insulto elegido y resignificado en *Putos Peronistas* sea ‘puto’, y no ‘prostituto/a’, como lo demuestran los testimonios de Iara incluidos en este documental y citados más adelante en este artículo: la activista reivindica su identitad de ‘puto’ (‘Me gusta ser *puto, pobre y peronista*’), mientras que rechaza rotundamente la identidad de ‘prostituta/o’ (‘No a la prostitución forzada’).

El documental abre con una escena de gran fiesta *queer* en la cual la locutora y actriz transexual Ariana Cano, lee, vestida de Evita, un manifiesto de la Agrupación ‘Putos Peronistas’ (2008):

‘Somos los putos peronistas. Nosotros representamos al pobre homosexual, al homosexual de barrio, que tiene sobre si una doble condena. Por un lado, su condición de pobre, y además, su condición sexual. Somos los peluqueros, somos los pantaloneros, somos las tortas, las travas con siliconas baratas y las transexuales sin identidad. Somos peronistas! Una afiliación política. […] Los pobres de nuestra tierra. […] *No somos un grupito gay más, no hacemos un gueto de nuestra vida*. Creemos que la única minoría en este país es la maldita oligarquía. Y del otro lado de ellos siempre está el pueblo, de diferentes ideologías (políticas, sociales y también sexuales). [….] Hay una sola verdad: *el puto es peronista y el gay es gorila*.’

Discurso ante el cual, los participantes de la fiesta, en tono de hinchada, responden: ‘Aquí están, estos son, son los putos de Perón’. Este enmarque discursivo inicial, es reforzado por el marco visual del texto fílmico. En efecto, el documental abre con dos imágenes iniciales emblemáticas: retratos fotográficos de Eva Perón y Juan Domingo Perón, e imágenes de simios con la inscripción ‘The battle of the gorillas’. Semejante apertura-marco visual sintetiza el antagonismo estructurante que se reiterará a lo largo del documental (pobre peronista vs. gorilas; mayorías oprimidas vs. minorías opresoras), sintentizado en la frase arriba citada que define al ‘puto’ por oposición al gay sobre la base de sus respectivas afinidades socio-política de clase (peronista vs. gorila).

**2.1. Identidad**

El documental realiza dos operaciones fundamentales: por un lado, desde el punto de vista retórico y discursivo-político, expone y revela los procesos de construcción de la identidad interseccional de ‘puto (peronista)’; por otro lado, desde el punto de vista enunciativo, pone en escena tales procesos identitarios, como en *Rosa Patria*, a través de procedimientos visuales y narrativos de enmarcado y re-enmarcado.

En primer lugar, desde el punto de vista de los procesos propiamente discursivos de construcción de esta identidad interseccional, lo que se destaca como componente primario e instituyente es la identidad de pobre (y sus alianzas con los marginales). De allí la noción de ‘minorías cualitativas’ que explica Pablo Ayala, uno de los activistas retratados como centrales en el documental: oponiéndose a la noción liberal de ‘minorías’ (sexuales y de género), Pablo define estas ‘minorías cualitativas’ como ‘aquellas que están fuera del poder’. Esto es, son minorías no por su número ni solamente por su posición de subordinación (por ejemplo, las mujeres entendidas como ‘minorías’, en sentido universalizante o no situado), sino porque representan ‘demandas populares’ (Laclau y Mouffe, 1987; Laclau, 1996, 2005), siempre situadas y locales, y postulan la inclusividad de los grupos.[[6]](#endnote-7)

En segundo lugar, desde el punto de vista de la política sexual identitaria, lo interesante es que la identidad ‘puto’ no es la feminización de una naturaleza o esencia masculina como lo pretendido en el insulto, sino que viene a incluir a una serie de sujetos que se identifican como ‘Tortas, Travestis, Trans y Putos’ (todos insultos). En este sentido, esta identidad es, ante todo, inclusiva y múltiple, de un modo algo análogo a la categoría de ‘sexualidad loca’, es decir, la figura de la ‘loca’ no como opuesta a ‘chongo’, sino en su sentido inclusivo de ‘fuga de la normalidad’ que había formulado Perlongher en los años 80 (1997: 33).[[7]](#endnote-8) Pero, al mismo tiempo, y esto no estaba en Perlongher, la noción de ‘puto’, en su propio movimiento performativo simultáneo de inclusión y reapropiación distanciada de la injuria, retoriza a través de la selección metonímica del insulto más violento y machista de todos, o por lo menos, el más explícitamente sexualizado y fetichizado u objetificado, para re-significar toda la diversidad identitaria que viene a nombrar. Así, en un movimiento retórico inclusivo logra apropiarse de otros insultos populares que se enuncian también en el documental: trolos, tortas, travas, trans. Este momento de fijación, siempre parcial, provisorio y precario, de identidad, es político y críticamente contrahegemónico, además de catacrésico (es decir, nombra algo nuevo), en la medida que, al apropiarse del insulto más sexualizado de todos y resignificarlo, es capaz de nombrar algo nuevo que no había sido nombrado por interpelaciones tales como ‘gay’, ‘homosexual’ o ‘lesbiana’, entre otros.[[8]](#endnote-9) Es decir, de todas las identidades LGBT incluidas, eligen *una* identidad, y de todos los insultos existentes, escogen sólo *uno*, porque es *uno* el antagonismo común y compartido; enfatizo el ‘*un/uno’*, porque es allí donde finca el movimiento crítico *y* contrahegemónico de fijación en una identidad compartida y diversa pero única, como resultado de una práctica articulatoria (Laclau y Mouffe, 1987) y de un movimiento de fijación que, aunque parcial y precario, apunta a una fijación que detiene el fluir o ‘diseminación’ (Derrida, 2004) de la cadena significante: un anclaje unívoco del sentido en una identidad muy determinada, situada y específica, pero no particularista (Laclau, 1996). La identidad ‘puto’ es *queer,* en este caso,no porque represente flujo o deriva del sentido y de las sexualidades, o por su supuesta rareza, sino porque es crítica, interseccional, subversiva, catacrésica y contrahegemónica: *deshace* (Butler, 2004)*,* por ‘fijación’ (Laclau y Mouffe, 1987) de un desplazamiento semántico del significante ‘puto’ –y no por pura diseminación o deriva del significante(Derrida, 2004)–al sujeto sexual, cultural y de clase y sus significados anteriormente asignados y sedimentados (deshace los significados dominantes, históricamente atribuidos a ‘gay’, ‘lesbiana’, ‘transexual’, ‘obrero de overall’, ‘descamisados’ o ‘soldados de Perón’, deshaciendo y re-enmarcando también, así, a los sujetos que portarían tales identidades).

El ejemplo más claro de este movimiento local de reapropiación del insulto es una consigna recurrente en el documental: ‘El puto es peronista. El gay es gorila’. De todas sus recurrencias, destaca cuando tal consigna se muestra como pintada política del grupo en un primer plano, enmarcado por una letra ‘V’, en una firma que reinscribe el célebre ‘Viva Perón’ en su forma grafica, añadiendo otra letra P (‘Vivan los Putos Peronistas’), la de ‘puto’, que ya contendría en sí misma, tres procesos de auto-construcción discursiva cruciales, a saber:

(1) por un lado, la intersección clase-sexualidad-género: según PP, si la diferencia entre gays y putos es de clase e identificación emocional-política, los gays de clase media estarían, en cambio, usando una palabra extranjera, ‘*gay*’, justamente para poder distanciarse del insulto popular ‘puto’ según una estrategia de distanciamiento por enfatización de su diferencia con tendencias separatistas (Sedgwick, 1994) de guetoización, pero serían, al mismo tiempo ‘incapaces’ –por las limitaciones ideológicas propias de su clase– de resignificar el insulto que los hiere, sin poder entender que además de herirlos y amenazarlos, también los constituye.[[9]](#endnote-10)

(2) por otro lado, tendría, al mismo tiempo, ya inscripto el trabajo de reapropiación positiva del insulto: esta ‘resignificación y revalorización del término “*puto*” como palabra portadora de valores de alteridad’ (Médica y Villegas, 2012: 18) no es otra cosa que la ‘*putez’ como valor,* conferido por los propios actores sociales implicados, dada su significación *emic* de (a) diversidad sexual (ídem: 4; si la diversidad y la alteridad son un valor, las verdaderas diversidad y alteridad residen en la experiencia social de la putez, y no en lo gay, ni en lo trans, ni en la femineidad en sí misma); (b) unidad (‘*siempre* hemos sido parte del pueblo’) y (c) equivalencia con los pobres peronistas (los ‘excluidos, desplazados’, insultados y humillados por cabecitas negras). Según Pablo Ayala: ‘la gente acepta a los putos peronistas por peronistas, porque los siente *iguales*, porque *se hermanan cantando la marcha peronista*’. Recordemos que en la marcha peronista, la construcción discursiva del antagonismo es pueblo vs capitalismo (‘combatiendo al capital’).

(3) Contra la concepción liberal reduccionista de la homosexualidad, el puto no solo es un sujeto privado –una identidad reducida a lo sexual, a aquello que ocurre ‘debajo de las sábanas’– sino que, en palabras de *Putos Peronistas*, ‘también puede pensar un proyecto político’.

**2.2. Marco y enmarcado / *frame* y *framing***

Avanzando hacia el segundo momento del análisis propuesto al principio de esta sección, me ocuparé a continuación de los procedimientos visuales y narrativos de enmarcado y re-enmarcado en *Putos Peronistas*. Como en *Rosa Patria*, me concentraré en el análisis de los *marcos* tanto narrativos como visuales en tanto que instancias propiamente enunciativas que incluyen y excluyen, esto es, nuestro foco analítico será, como antes, la operación misma del marco: aquella fuente textual (o ‘*foyer’*; Metz, 1991) de aquello que se torna ya sea (in)visible dentro de lo visual, o (in)inteligible en el relato, o (ir)reconocible en las identidades. El procedimiento técnico-visual privilegiado es aquí también, como en *Rosa Patria*, la reduplicación de la pantalla, procedimiento meta-enunciativo no mimético que, al reenviar al medio ‘cine’, a la ficción y al relato fotográfico-fílmico mismos, es clave, ya que no ‘representa’, sino que *realiza* a la vez que *metaforiza* el pasaje de elemento a momento.

Este pasaje sólo es posible a partir del elemento ‘fictivo’ (Foucault, 1995), de *fictio iuris* (Laclau & Mouffe 1985: 140) o metadiegético (Genette, 1972) puesto en acto por esa pantalla interior que abre el espacio de la vida de Iara como ficción biográfica, de manera análoga a como analizáramos tal pasaje como procedimiento meta-enunciativo que introduce meta-cinematográfica y meta-diegéticamente la vida de Perlongher como ficción biográfica en *Rosa Patria*: del documental a la ficción enmarcada, de lo social a lo político, es decir, de elemento a momento.

**2.2.1. Marco visual**

El marco de *Putos peronistas* como texto audiovisual cumple la función de figurativizar tanto visual como narrativamente la identidad ‘puto’ como una interpelación sobredeterminada por la condición socio-cultural de clase, a través de la construcción de personas-personajes concretos e instancias de mostración de la enunciación visual. Esto se logra a través del hecho de que dichas instancias de re-enmarque –la metanarrativa y la metaenunciativa– convocan al peronismo y a la figura de Evita, a nivel textual, y no solo de contenido ideológico.

Desde el punto de vista visual, el marco enunciativo aparece desde el comienzo a través del uso de fotos enmarcadas: si el documental abre con un *collage*, enmarcado en fondo sepia, de fotos blanco y negro fijas, de archivo, de Perón y Evita, y con un manifiesto de la Agrupación ‘Putos Peronistas’, leído por una mujer transexual vestida de Evita (al lado de un varón *queer* encarnando a Perón), *Putos Peronistas* cierra con el testimonio de la travesti Iara Ybarra, quien aparece desde el principio como persona-personaje a lo largo de todo el documental tomado como relato.

Hacia el final, las fotos enmarcadas reaparecen, pero esta vez precedidas por otro tipo de reduplicación de la pantalla: el marco contenido no es ya solo el de la foto fija, sino también, el de la pantalla cinematográfica misma: el cuadro en movimiento del propio filme documental aparece así englobado por una pantalla segunda. Se trata, en efecto, del momento final de la diégesis consistente también, como en su inicio, en la lectura de un discurso, pero esta vez no se trata de una performance teatral sino de un testimonio: es el testimonio de Iara, quien lee un texto personal durante la manifestación pública en apoyo y demanda de la Ley de Identidad de Género, de manera análoga, pero diferencialmente política, al discurso leído por la transexual Ariana en su performance *drag* representando a Evita que había iniciado la diégesis documental. El discurso de Iara pasa de ser diegético-documental a convertirse en metadiegético-‘ficción’, y dicho pasaje está marcado por la introducción de una doble pantalla: un enmarcado en negro con bordes de formato cine, introduciendo por primera vez en este documental, la pantallización fílmica en abismo (Metz, 1991). La pantalla en la pantalla remite aquí al cine como instancia ficcional (Metz, 1991), señalando, a su vez, como en el texto de Loza, la instancia fictiva de la política como el ad-venir, lo político como aquello que instaura la ciudad futura, el ‘ficcionar’ de la política.

El documental cierra inmediatamente con una ventana, enmarcada como al inicio en fondo sepia, pero que abre ahora a una imagen en movimiento: un mini-video filmado de Iara en la marcha al lado de otra compañera travesti, bailando y sosteniendo una pancarta de PP, en una situación final eufórica, anclada como tal por un cartel informativo sobre la aprobación de la Ley de Identidad de Género y el consiguiente cambio de nombre legal de Iara. Inmediatamente, la cámara panea hacia abajo y muestra, sobre el mismo fondo enmarcante, un dibujo titulado ‘pibe peronista’, y luego una foto en blanco y negro de dos niños, sobre el mismo fondo sepia, montando caballos de madera, posiblemente de calesita, seguidos por una foto de una modelo fuertemente erotizada, con la leyenda ‘transversalidad’: toda la iconografía del pueblo peronista feliz, abrevando en su inclusividad histórica (niños, mujeres y personas trans), se edita interponiéndola, otra vez, con las fotos de archivo de sus líderes históricos, Eva y Juan Domingo Perón.

Luego de los créditos, interpuestos entre fotos emblemáticas del pueblo-nación peronista, siempre enmarcadas por el mismo fondo sepia como marco, el documental usa como cierre final una cita de Paco Jamandreu, el célebre modisto *gay* de Evita: ‘Ser puto, ser pobre y ser Eva Perón es la misma cosa’. Tal formulación discursiva enlaza directamente con la ecuación identitaria estructurante del discurso del documental: puto = pobre = Eva Perón. Autodefinidos explícitamente como ‘hemos sido siempre *parte* del pueblo’[[10]](#endnote-11) estos tres términos constitutivos de los putos peronistas no son sino tres momentos de una identidad única, acercándose así, en el límite mismo o ‘umbral inferior’ de la representación, al polo de la pura presencia en la teoría de la representación política (Laclau y Mouffe, 1987, Laclau, 2005): el principio del antagonismo es aquí tan fuertemente unificante e instituyente de una diferencia que prevalece totalmente sobre los principios de equivalencia y de diferencia. Puto, pobre y Eva Perón no son equivalentes, no son diferencias ya constituidas que luego se aliarían en una cadena equivalencial, sino que son partes constitutivas o ‘momentos’ (Laclau y Mouffe, 1987) de una identidad única. Esta identidad es *una* porque la práctica articulatoria que la instituyó como tal es *un* antagonismo (simultáneamente sexual y de clase) que es su condición de posibilidad y emergencia: dicho antagonismo es lógicamente anterior e instituyente de su diferencia.

**2.2.2. Marco narrativo**

El marco narrativo, fictivo, del documental enmarca y confiere sentido a la historia de Iara, su principal protagonista. Su dimensión ‘fictiva’ deriva de su relación intertextual con los relatos populares, reales y ficcionales, sobre la vida de Evita. Pareciera imposible entender el marco narrativo del documental por fuera de este paralelismo respecto de una biografía tan revisitada y (re)imaginada: de una infancia de pobreza y abandono, a ministra del estado, luchando por la justicia de otras y otros, y a intelectual orgánica de la comunidad LGBT barrial y pobre.

La dimensión testimonial, y no simplemente documental, está marcada por el relato en primera persona que presenta Iara a manera de auto-narración personal, colectiva y generacional: ‘Yo soy Iara Ibarra. Soy de la Agrupación Putos Peronistas. Estoy acá por mis madres de ruta, que hoy ya no están. Quiero dejar marcado que estuve en esa vida, y *quiero dejar un registro.* […] Me gusta ser *puto, pobre y peronista*.’ Este registro documental en primera persona es reforzado, en su dimensión colectiva, por sus compañeras y compañeros de lucha que refuerzan la dimensión testimonial de la voz de Iara, a través del uso cualificado que estos miembros de la Agrupación PP hacen de la tercera persona para completar colectivamente la biografía de Iara: ‘Iara es la voz del pueblo. Iara es la voz de La Matanza’.

El esquema narrativo es simple y reproduce el recorrido de Evita desde una situación inicial disfórica de privación y violencia absoluta (abandono, humillación, pobreza, falta del derecho a la educación, prostitución forzada, etc.), que tan bien condensa el insulto (‘puto’/’puta’), a una situación final eufórica: Iara se ha transformado al final en sujeto de un discurso en el espacio público. El documental cierra con las siguientes palabras testimoniales leídas por una Iara, ahora líder, como portavoz de la Agrupación PP, en una manifestación masiva por la Ley de Identidad de Género, y ante un público multitudinario:

Anoche yo estaba parada en la ruta, y hoy que esté acá parada dice mucho, no? Y agradezco por tener salud y estar acá frente a Uds. Quiero reconocer delante de todos Uds. que soy un poco ignorante para leer este papel, pero es porque me quitaron el derecho a tener una educación, y me crié así, a la deriva de dios, sin ir a la escuela. […] Simplemente soy una marica que salió en búsqueda de un par de tetas, y encontré una infinidad de historias, de compañeras que se quedaron en el camino por querer un poquito de tetas […] que nos sigan acompañando, porque nosotras somos el futuro. Que nos sigan enseñando cosas […] No a las siliconas, no a la ruta, no a la prostitución! Queremos un trabajo digno. Queremos vivir en democracia. […] basta de derramar sangre sobre el asfalto. Gracias a este gobierno. Gracias a Néstor. Gracias, Cristina! Viva Perón, carajo!

Esta secuencia está enmarcada, significativamente como analizamos en el acápite anterior, por un borde negro formato cine, marcando así el régimen ficcional de la política como relato imaginativo y transformador de las personas. Se trata, así, de un recorrido narrativo-biográfico de pasaje de elemento a momento, esto es, de objeto para ser consumido en la ruta, a sujeto capaz de ocupar un lugar en la esfera pública y con acceso al discurso público.

Hacia el final, una vez terminada la presentación del mundo diegético-documental, un cartel nos informa, cerrando así la dimensión colectiva y pública de esta biografía: ‘El 9 de mayo de 2012 el Congreso Nacional aprobó la ley de identidad de género. “La Iara” es ahora Iara Otonel, dejó la ruta y trabaja para el Ministerio de Justicia de la Nación.’ Trayectoria emblemática en los relatos populares sobe Evita: de ‘puta’ a santa; de niña pobre pueblerina a estrella de cine y radio en la ciudad, y ministra del gobierno nacional.

Este paralelo Iara/Evita invierte, revierte y completa al relato ficcional ‘Evita vive’ de Perlongher (1975) devolviendo al documental cierta materialidad y subjetividad que le había negado pero quizás también ambivalentemente insinuado aquel célebre relato *queer* sobre Evita. En efecto, en la ficción perlonghiana, Evita es una mujer cis-género, pero cuya caracterización, por exceso de artificio o mascarada, se acerca más a la de una *drag queen* o a la figuración *estereotípica* de una travesti, que a la de una mujer cis-género, o incluso que al de una ‘loca’ o una ‘marica’. Aunque literalmente mujer cis-género, la Evita de la ficción perlongheriana sigue, a nivel de la construcción del personaje, muchos rasgos que la acercan más a una travesti: *la* mejor amiga de las locas, con quienes comparte charlas, gustos y el sexo orgiástico con sus ‘chongos’ (varones bisexuales con énfasis de rasgos masculinos y posición insertiva en el acto sexual tanto con mujeres como con otros hombres). Cabe recordar también que la Evita de la obra teatral de Copi (2006 [1970]) fue repetidamente representada por actores hombres, y que la construcción del personaje de Evita en esta obra está atravesada por el travestismo (Simón, 2005) desde el punto de vista de su textualidad dramática: la ficción desestabiliza aquí, una vez más, el cis-género del personaje histórico, ‘real’, a la vez que reafirma el estatuto político-fictivo de Evita como persona-personaje (Verón, 1980), esa figura que atraviesa y habita todavia hoy el imaginario político argentino, con una materialidad travesti, aún viva – ‘Evita vive’ (en *1975*)– capaz de deconstruir la oposición realidad/ficción a favor de este último término.

*Putos Peronistas*, por su parte, reinscribe este proceso, revirtiéndolo, pero también completándolo: Evita, la mujer cisgénero y la primera figura que aparece tanto en la diégesis como en el discurso de su relato, se revela aquí –en su ‘transposición metafórica’ (Laclau y Mouffe, 1987: 140), material, a través de la persona real de Iara Otonel– como una mujer trans-género, tal como lo había insinuado la ficción perlongheriana (el transgénero deconstruye, en última instancia, a toda pretensión cisgénero). Dicho paralelo es reforzado en varias instancias del filme y no es exclusivo de Iara, pues se repite también como ‘metáfora maestra’ o ‘*meta*-metáfora’ para la biografía de otras compañeras travestis, también retratadas en este documental.

**3. Conclusiones**

Es importante destacar que aquello que comparten *Rosa Patria* y *Putos Peronistas* es del orden de lo nuevo en las representaciones fílmico-documentales de sujetos LGBT: esta irrupción de lo nuevo puede leerse en la aparición (reflexiva) de la pantalla cinematográfica que viene a reconocer en las diferencias no heteronormativas un marco (Butler, 2010) que remite a identidades ‘especificables’ como tales (Laclau y Mouffe, 1987; Butler, 2010: 141-142), y a sujetos con un discurso propio en el espacio público. Esta visibilidad del marco señala historicidad como ruptura y discontinuidad, es la huella del orden del acontecimiento en la medida en que abre un espacio de ‘ficción’ en el interior mismo del documental, y del carácter de condición de la primera respecto del último. No se trata de cualquier espacio metadiegético, sino de un espacio muy singular, metaenunciativo, ya que es *la* condición misma del enunciado fílmico-documental: el espacio simbólico del ‘*fictio iuris’* – o ‘transposición metafórica’ (Laclau y Mouffe, 1987: 140) – propia de la representación política, el umbral que permite a un sujeto entrar tanto en la polis como en el orden simbólico.

La pantalla cinematográfica estaría así volviendo opaco a la vez que visible este momento de transposición metafórica, el carácter fictivo de toda identidad, la operación construida de su marco. De este modo se ‘desliteralizan’ los homosexuales y las personas trans: del polo de la ‘pura presencia’ – el puro elemento inarticulado, el puro atributo ya sea fetichizable, ya sea, abyecto, pero objetivable en insultos usualmente dirigidos a otros sujetos – emergen en el terreno de la visibilidad como ‘representación’, es decir, como sujetos a la vez que como momentos articulables a un discurso. Es en este sentido que propongo leer la figurativizacion icónica y narrativa del marco como pantalla reduplicada y como biografía personal y colectiva que enlaza en un mismo entramado narrativo persona y personaje, realidad y ficción: al poner en primer plano el ficcionar o ‘ficcionalizar’ (Dimitrova *et al*, 2012: 22-23)*,* la doble pantalla se convierte en superficie de inscripción de un *site* o lugar nuevo del decir – lo poético en Angus (2000: 125-126) – capaz de dar lugar a un nuevo sujeto de la representación pública, política. El *ficcionar/ficcionalizar* del cine – no en el sentido de ‘dramatización’ literaria o espectacularización teatral, sino en su sentido más radicalmente *material* que le había otorgado el segundo Metz (1982 [1977]) en su etapa lacaniana: el ficcionar propio del cine radica en la materialidad misma de su significante imaginario, donde lo ficcional-imaginario deviene la materia del cine, una materia desprovista de toda presencia física. El ficcionar del cine es, así, un momento fuertemente ‘*proto-político*’ (Dimitrova *et al*, 2012: 22). ¿Por qué? Porque tal ficcionar *específicamente fílmico* produce materialmente –esto es, a través de la materia significante audiovisual-cinética– sujetos ‘virtuales’ que están físicamente ausentes, pero materialmente presentes a través de este ‘ficcionar’ audiovisual-cinético propio del cine. Es decir, la política como poética: es precisamente este trabajo importantísimo de traducir ‘*the site*’ de la política en ‘*le site*’ del cine, lo que estos documentales fundamentales de Loza y Cesatti lograron realizar en el espacio público argentino del nuevo milenio.

**REFERENCIAS BIBLIOGRÁFICAS**

Angus, Ian

2000 *(Dis)figurations. Discourse/Critique/Ethics,* London-New York: Verso.

Barthes, Roland

1998 [1977] *Fragmentos de un discurso amoroso*. México: Siglo XXI.

Butler, Judith

2004 *Undoing Gender.* New York-London: Routledge.

2010 [2009] *Frames of War. When is Life Grievable?* London-New York: Verso.

Copi

2006 [1970] *Eva Perón*, Paris: Christian Bourgois.

Corominas, Joan

2011 Breve diccionario etimológico de la lengua castellana. Madrid: Gredos.

Derrida, Jacques

1987 [1978] *The Truth in Painting,* Chicago-London: The University of Chicago Press.

2004 [1972] ‘Dissemination’, in *Dissemination*, London-New York: Continuum ; pp. 317-401.

Dimitrova, Petja; Eva Egermann; Tom Holert; Jens Kastner y Johanna Schaffer

2012 *Regime. Wie Dominanz organisiert und Ausdruck formalisiert wird*. Münster: assemblage.

Foucault, Michel

1980 [1970] *El orden del discurso*, Barcelona: Tusquets.

1995 [1978] *La verdad y las formas jurídicas*, Barcelona: Gedisa.

Forastelli, Fabricio

1999 ‘Políticas de la restitución. Identidades y luchas homosexuales en la Argentina’, pp. 117-141 in Fabricio Forastelli and Ximena Triquell (ed.), *Las marcas del género. Configuraciones de la diferencia en la cultura.* Córdoba (Argentina): UNC.

French, William y Katherine Bliss (eds.)

2007 *Gender, Sexuality, and Power in Latin America Since Independence.* Plymouth:

Rowman & Littlefield.

García, Germán L.

1980 *Oscar Masotta y el psicoanálisis en castellano*. Barcelona: Argonauta.

Genette, Gérard

1972 *Figures III.* Paris: Du Seuil.

Goffman, Erving

1986 *Frame analysis: an essay on the organization of experience.* Lebanon, New Hampshire: Northeastern University Press.

Laclau, Ernesto

1990 *New Reflections on the Revolution of Our Time.* London:Verso.

1994 ‘Introduction’, pp. 1-8 in Ernesto Laclau (ed.) *The Making of Political Identities.* London: Verso.

1996 *Emancipación y diferencia*. Buenos Aires: Ariel.

2005 *On Populist Reason.* London-New York: Verso.

Laclau, Ernesto y Chantal Mouffe

1987 [1985] *Hegemonía y estrategia socialista. Hacia una radicalización de la democracia.* Madrid: Siglo XXI.

Laclau, Ernesto y Lilian Zac

1994 ‘Minding the Gap: The Subject of Politics’, pp. 11-39 in Ernesto Laclau (ed.) *The Making of Political Identities,* London: Verso.

Lefebvre, Henri 1975 [1967]

*El derecho a la ciudad*. Barcelona: Península.

Médica, Gerardo y Viviana Villegas

2012 ‘A la vera de la Ruta 3 “la gloriosa doble P”. Una aproximación a las “Putos Peronistas” de La Matanza’*, Oral History Forum d’histoire orale*, 32 (2012), Edición Especial ‘Historia Oral en América’.

Metz, Christian

1982 [1977] *Psychoanalysis and Cinema: The Imaginary Signifier.* London: Macmillan.

1991 *L’enonciation impersonnelle ou le site du filme.* Paris: Meridiens Klincksieck.

Molano Camargo, Frank

2016 ‘El derecho a la ciudad: de Henri Lefebvre a los análisis sobre la ciudad capitalista contemporánea’, *Folios*, 44, Segundo semestre 2016; pp. 3-19.

Moliner, María

2006 *Diccionario de uso del español*. Madrid: Gredos.

Olivera, Guillermo

1999 ‘Políticas de la representación homosexual: De los discursos de la transparencia a las disputas por la visibilidad’, pp. 143-158 in: Fabricio Forastelli y Ximena Triquell (ed.), *Las marcas del género. Configuraciones de la diferencia en la cultura.* Córdoba (Argentina): UNC.

Palmeiro, Cecilia

2016 ‘Derivas de lo *queer* en la Argentina: hacia una genealogía’, pp. 107-135, in Lucas Martinelli (ed.), *Fragmentos de lo* queer*. Arte en América Latina e Iberoamérica*, Buenos Aires: Facultad de Filosofía y Letras (UBA).

Perlongher, Néstor

1997 *Prosa plebeya. Ensayos 1980-1992*. Buenos Aires: Colihue.

1997 [1975] ‘Evita vive’, pp. 191-195 in *Prosa plebeya. Ensayos 1980-1992*. Buenos Aires: Colihue.

1997 [1984] ‘El sexo de las locas’, pp. 29-34 in *Prosa plebeya. Ensayos 1980-1992*. Buenos Aires: Colihue.

1997 [1991] ‘Ondas en el Fiord. Barroco y corporalidad en Osvaldo Lamborghini’, pp. 131-138 in *Prosa plebeya. Ensayos 1980-1992*. Buenos Aires: Colihue.

2003 [1997] *Poemas Completos (1980-1992)*, in Echavarren, Roberto (ed). Buenos Aires: Seix Barral.

2016. *Correspondencia.* (Compilación de Cecilia Palmeiro). Buenos Aires: Mansalva.

RAE [Real Academia Española]

2018, *Diccionario actualizado*, <https://dle.rae.es/?id=UjqH8h6> [ultimo acceso: 31.7.2019]

Schaffer, Johanna

2008 *Ambivalenzen der Sichtbarkeit. Über die visuellen Strukturen der Anerkennung*, Bielefeld: transcript.

Sedgwick, Eve K.

1994 [1990] *Epistemology of the closet.* London-New York: Penguin.

Simón, Gabriela

2005 ‘El "efecto travestismo" como política de escritura: acerca de Eva Perón de Copi.’ *Cuadernos Sur, Letras*, 35-36, Bahía Blanca.

Tagg, John

2009 *Disciplinary Frame: Photographic Truths and the Capture of Meaning*. Minneapolis-London: University of Minnesota Press.

Verón, Eliseo

1980 ‘Relato televisivo e imaginario social’. *Lenguajes*, 4: 26-35. Buenos Aires: Tierra Baldía.

2001 *El cuerpo de las imágenes.* Buenos Aires: Norma.

2013 *La semiosis social, 2. Ideas, momentos, interpretantes.* Buenos Aires: Paidós.

Vespucci, Guido

2011 ‘Explorando un intrincado triángulo conceptual: homosexualidad, familia y liberación en los discursos del Frente de Liberación Homosexual de Argentina (FLH, 1971-1976)’, *Historia crítica*, enero-abril 2011; pp. 174-197.

Viteri, María-Amelia

2014 *Desbordes. Translating Racial, Ethnic, Sexual and Gender Identities across the Americas.* New York: State University of New York.

Žižek, Slavoj

1990 ‘Beyond Discourse Analysis’, pp. 249-59 in Ernesto Laclau (ed.), *New Reflections on the Revolution of Our Time*. London: Verso.

Žižek, Slavoj

2014 *Event: Philosophy in Transit.* London: Penguin.

**FILMES:**

*La Raulito golpes bajos* (Emiliano Serra, 2009)

*Lesbianas de Buenos Aires* (Santiago García, 2004) [2002]

*Putos peronistas, cumbia del sentimiento* (Rodolfo Cesatti, 2012) [2011]

*Rosa Patria* (Santiago Loza, 2009) [2008].

1. Este artículo es resultado de un proyecto de investigación mayor que propone leer un corpus más amplio de producciones documentales independientes del periodo posterior a la crisis del 2001 como participando en el registro de este pasaje de elemento a momento por re-enmarcado, en la historia de las representaciones LGBT en el cine documental argentino: *Lesbianas de Buenos Aires* (García, 2004), *La Raulito golpes bajos* (Serra, 2009), además de las ya mencionadas *Rosa Patria* (Loza, 2008-2009) y *Putos peronistas, cumbia del sentimiento* (Cesatti, 2011-2012). [↑](#endnote-ref-2)
2. *Framing*, *re-framing*, *de-framing*, en la terminología de Zizek (2014), que re-trabaja los conceptos homónimos provenientes de Goffman (1986) y Butler (2010), entre otros. [↑](#endnote-ref-3)
3. Una primera versión de este análisis de *Rosa Patria* fue publicado en español como parte del artículo‘Cambios de marco y diversidades sexo-genéricas en el documental argentino: un análisis retórico y enunciativo de *La hora de los hornos* y *Rosa Patria*’, *Revista de Cine Documental*, 8 (15), 67-94, 2017. [↑](#endnote-ref-4)
4. En el campo del cine de ficción, este registro del cambio de marco había comenzado mucho antes, ya en la primera post-dictadura con filmes como *Adiós Roberto* (Dawi, 1985) y *Otra historia de amor* (Ortiz de Zárate, 1986). [↑](#endnote-ref-5)
5. La distinción entre ‘diegesis’ y ‘metadiegesis’ hace referencia a los distintos ‘niveles narrativos’ (Genette, 1972: 238-241) de un texto considerado como relato. Según Gerard Genette (239), ‘el prefijo *meta-* connota […] el pasaje al segundo grado: el *metarelato* es un relato dentro del relato, la *metadiegesis* es el universo de este relato segundo como la *diegesis* designa el universo del relato primero’ (mi traducción; énfasis en el original). Así, si el relato diegetico nos cuenta la historia principal del documental (diégesis) presentada directamente al espectador a través de la cámara del documentalista, los relatos metadiegeticos son todos los relatos ‘segundos’, contenidos o encapsulados dentro de este relato principal a través de otras pantallas segundas, o contenidas como ‘pantallas dentro de la pantalla’ que no son presentadas directamente al espectador, sino a través de la mediación de la cámara del documentalista, cámara que, en recepción, deviene pantalla englobante (por ejemplo, el material fílmico de archivo no editado, sino proyectado en una pantalla y luego filmado, constituirá un relato metadiegetico). Si hay metadiegesis, es que hay dos relatos en dos niveles diferentes: por ejemplo, en *Rosa patria*, si la diegesis es el el relato del presente filmado (2008-2009), la metadiegesis son los relatos que nos narran las pantallas de super 8 sobre la infancia y juventud de Néstor Perlongher. [↑](#endnote-ref-6)
6. ? Entiendo aquí ‘demandas populares’ en el sentido que lo conceptualizan Laclau y Mouffe (1987) y Laclau (1996, 2005), a partir de su distinción entre demandas populares (articuladas alrededor de un antagonismo radical capaz de generar, luego, diferencias) y demandas democráticas (construidas a partir de la proliferación de diferencias). Concebida como resultado de una ‘demanda popular’ de reconocimiento, la identidad ‘puto’ emerge así como resultado de un trabajo simbólico sobre el antagonismo (vs la sexualidad dominante instituida por el poder patriarcal, clasista y heterosexista), y no solo sobre la diferencia. [↑](#endnote-ref-7)
7. Enfatizo el sentido inclusivo, analítico, que le da Perlongher a la noción de ‘sexualidad loca’, incluyendo aun la sexualidad del ‘chongo’, entre tantas otras como las ‘del travesti, el taxiboy, la señora, el tío’ o el gay, en tanto que ‘fuga de la normalidad’. Es en este sentido inclusivo, analítico o político que sostengo la analogía entre la ‘loca’ en Perlongher y el ‘puto’ en PP, y no en el sentido descriptivo o ‘social’ del término ‘loca’ como remitiendo a un simple afeminamiento personológico (Viteri, 2014: 21-48). Debido a razones de espacio, no me detengo aquí a discutir los matices de diferencia entre ‘minorías cualitativas’ y los ‘devenires minoritarios’ dentro de los cuales se puede entender la categoría de ‘loca’ en Perlongher. Para un estudio explicativo de estos devenires minoritarios y del deleuzianismo en Perlongher, ver, entre otros, los trabajos de Palmeiro (2016; Palmeiro en Perlongher, 2016) [↑](#endnote-ref-8)
8. Un proceso en parte similar a lo que el que término ‘*queer*’ pretendió lograr en los años 90 en los países anglófonos. [↑](#endnote-ref-9)
9. Es decir, aferrados a defender sus demandas particularistas y celebrar su diferencia, serían *incapaces de simbolizar el antagonismo* que los constituye como sujetos. Como tan sabiamente lo había señalado Barthes (1998), en su etapa lacaniana: ‘Allí donde hay *herida*, hay *sujeto*’. [↑](#endnote-ref-10)
10. En este punto, la impronta del FLH en *Putos Peronistas*, es clara, y presupone, otra vez, una crítica a la noción liberal de ‘minoría’. Sobre esta concepción no separatista de los homosexuales como ‘*parte* insustituible del pueblo’ en los inicios del FLH, véase Forastelli (1999), Olivera (1999) y Vespucci (2011). [↑](#endnote-ref-11)
